# Supplementary material for: A near infrared fluorescent probe for rapid sensing of peroxynitrite in living cells and breast cancer mice
Source: Royal Society of Chemistry journal article supplement (doi:10.1039/d3ra01024d), 2023-01-01
Supplement: d3ra01024d1.pdf [file d3ra01024d1.pdf]

## A near infrared fluorescent probe for rapid sensing of peroxynitrite in living cells and breast cancer mice

Zixiang Xu<sup>a</sup>, Zhencai Xu<sup>\*b</sup>, Dong Zhang<sup>\*b</sup>

<sup>a</sup> Department of oncology, Affiliated Hospital of Nantong University, Medical School of Nantong University, Nantong 226001, China

<sup>b</sup> Guanyun People's Hospital, Lianyungang, Jiangsu, 222000, China

Corresponding author email: [xu2454287273@163.com](mailto:xu2454287273@163.com); [zhangd123456@sina.com](mailto:zhangd123456@sina.com)

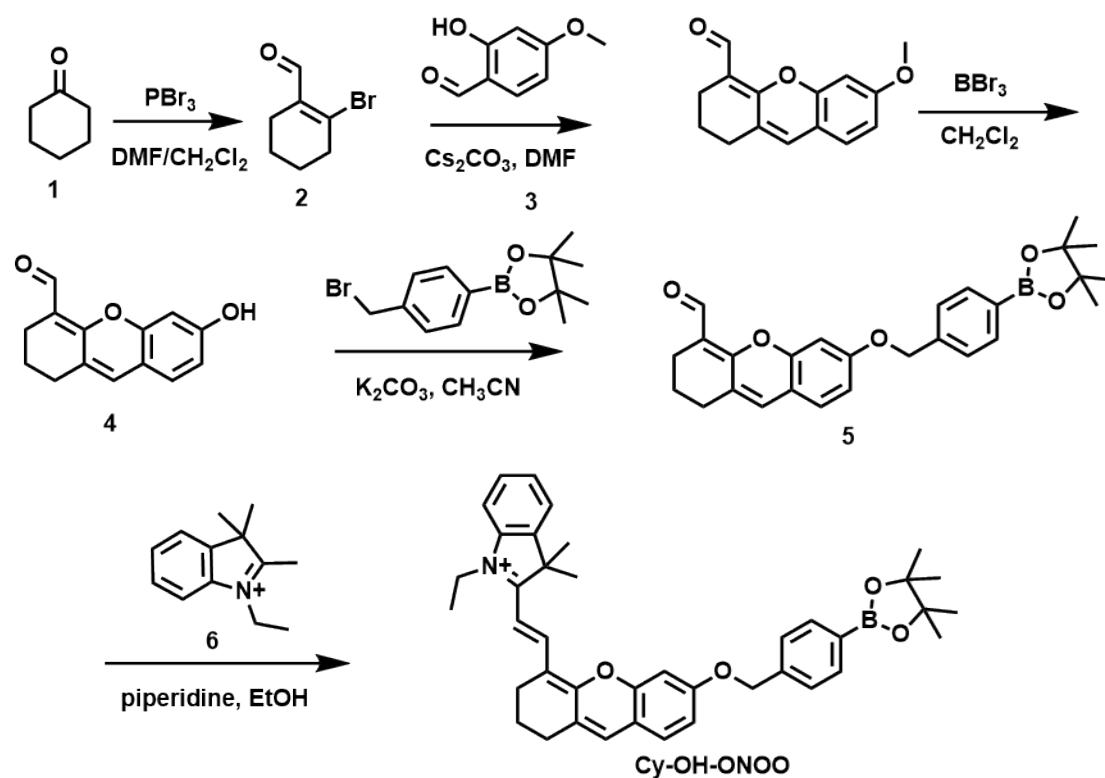

**Scheme S1.** The general synthetic routes for the probe Cy-OH-ONOO.

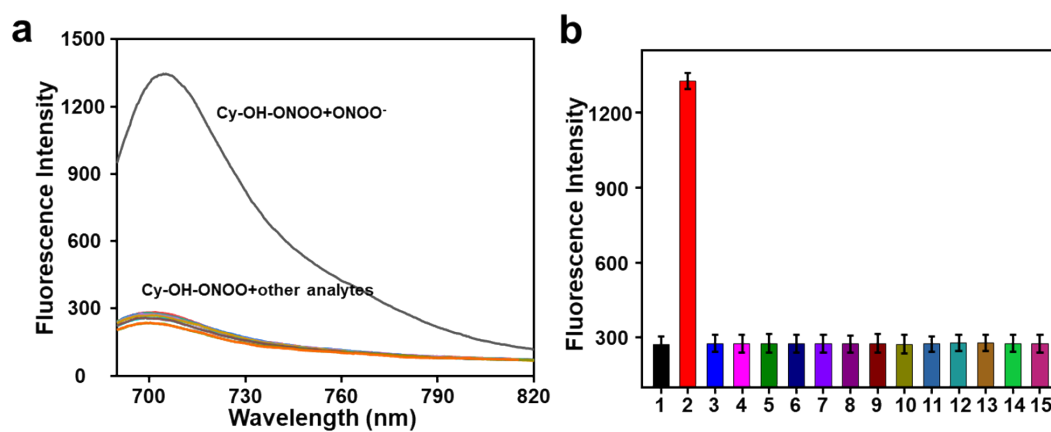

**Figure S1.** The selectivity of Cy-OH-ONOO to other analytes. 1. Blank, 2. ONOO<sup>-</sup>, 3. Na<sup>+</sup>, 4. K<sup>+</sup>, 5. Ca<sup>2+</sup>, 6. HCO<sub>3</sub><sup>-</sup>, 7. Br<sup>-</sup>, 8. HS<sup>-</sup>, 9. Lys, 10. Glu, 11. Thr, 12. Trp, 13. Ser, 14. Met, 15. Asp.

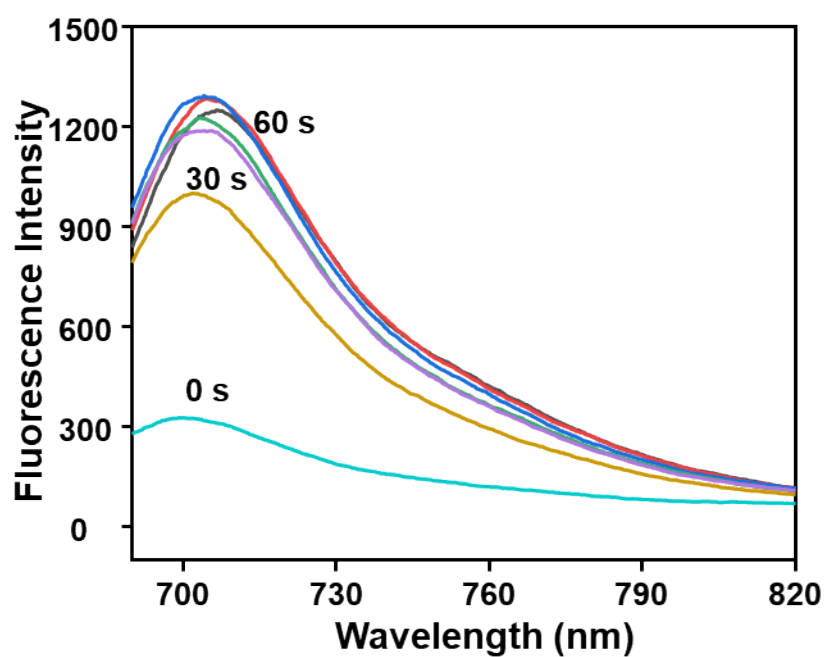

**Figure S2.** The fluorescence spectrum changes of Cy-OH-ONOO for rapid detection of ONOO<sup>-</sup> (20 μM).

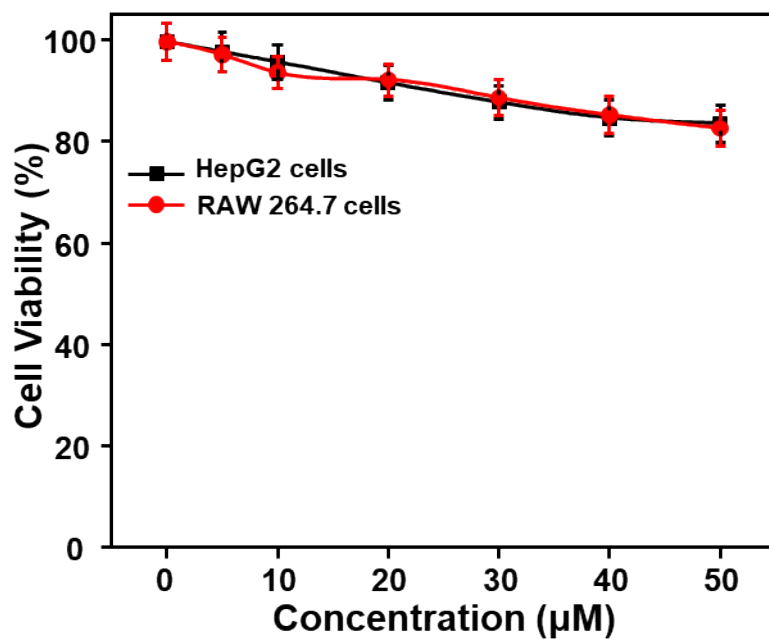

**Figure S3.** The cell viability of the probe against HepG2 cells and RAW 264.7 cells. The experiments were repeated three times and the data were shown as mean ( $\pm$  S.D.).

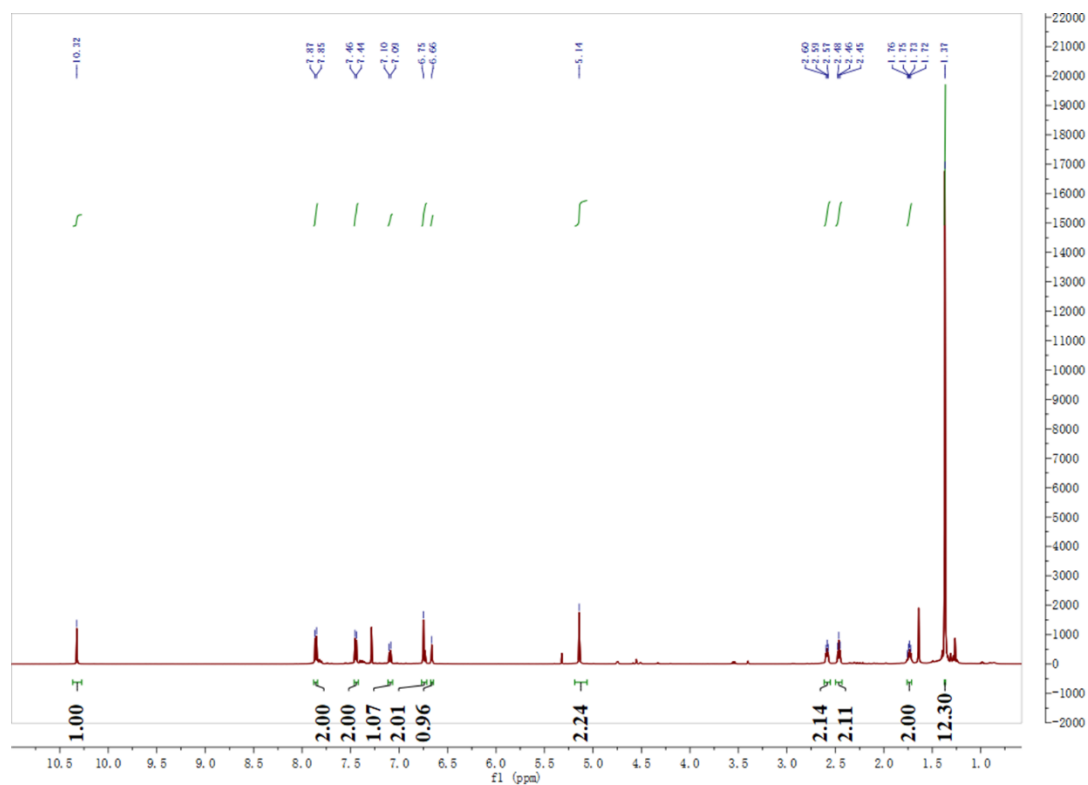

**Figure S4.**  $^1\text{H}$  NMR of Compound 5.

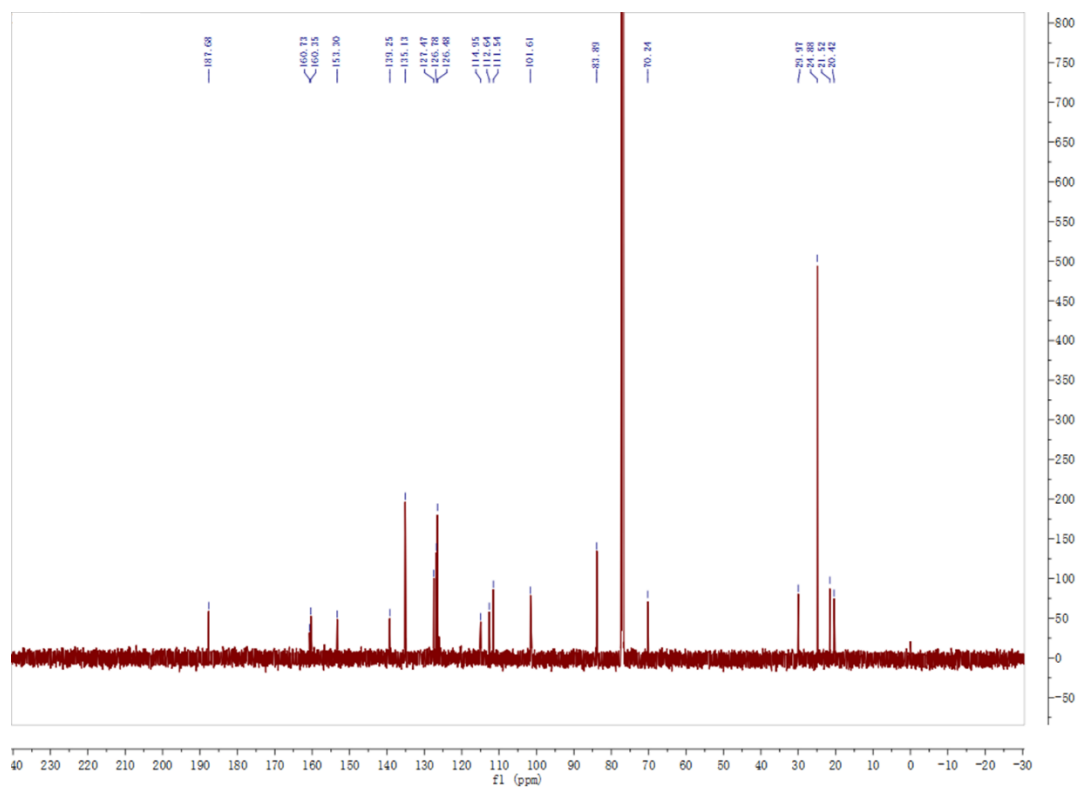

Figure S5.  $^{13}\text{C}$  NMR of Compound 5.

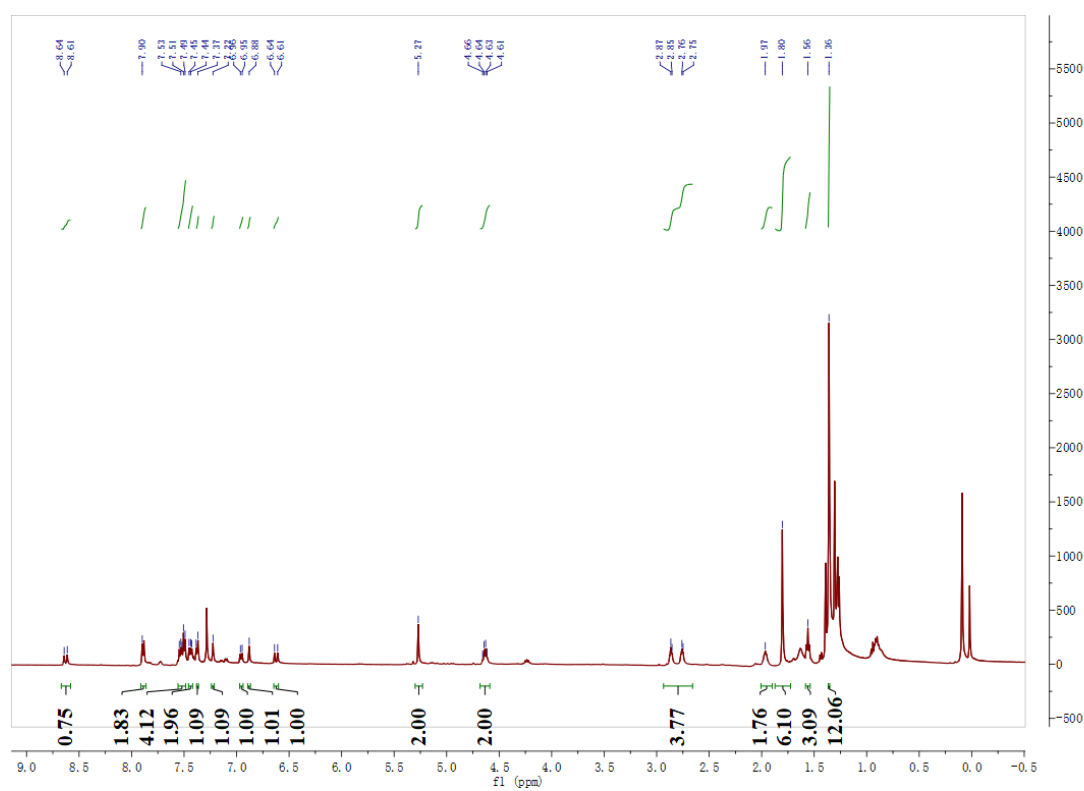

Figure S6.  $^1\text{H}$  NMR of Cy-OH-ONOO.

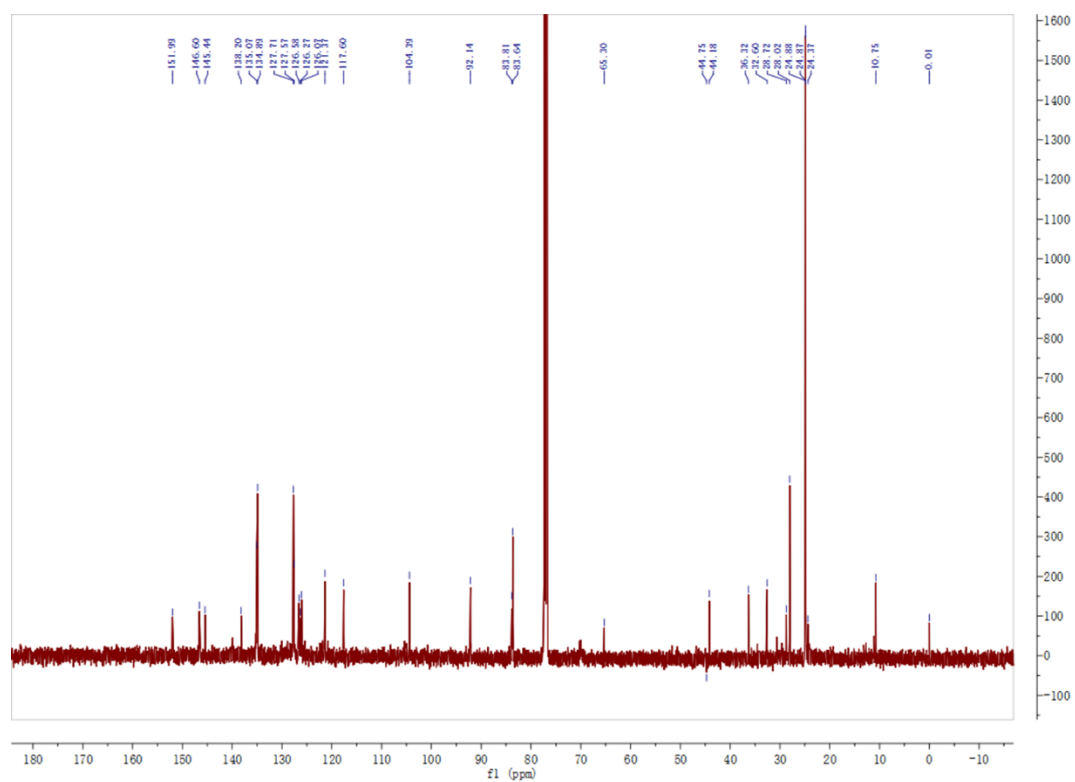

Figure S7.  $^{13}\text{C}$  NMR of Cy-OH-ONOO.

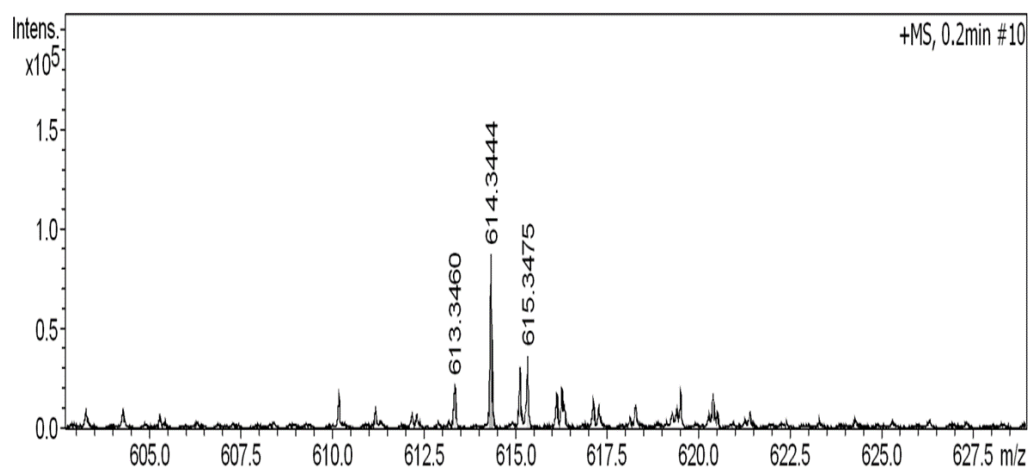

Figure S8. HR-MS spectrum of Cy-OH-ONOO.
